# Supplementary material for: Decrease in Available Soil Water Storage Capacity Reduces Vitality of Young Understorey European Beeches (Fagus sylvatica L.)—A Case Study from the Black Forest, Germany
Source: Plants (Basel). 2013 Oct 23;2(4):676–98. doi: 10.3390/plants2040676 (PMC4844385; doi:10.3390/plants2040676)
Supplement: Supplementary File 1 [file plants-02-00676-s001.xls]

## Sheet: ASWSC calculation
Profile information				Horizon specific soil information
				Horizon A																			Horizon B																			Horizon C
Row no.	Plot no.	Profile no.		H Depth (No. 1) (cm)	H Depth (No. 2) (cm)	H Depth (No. 3) (cm)	H Depth (Mean) (cm)	Skeleton (volume %)	Fine earth (volume %)	Colour (Munsell)	Ratio of sand /clay /silt in fine earth	Soil texture class (German)	Soil texture class (FAO)	Soil organic matter content/ humus (short form)	Soil organic matter content/ humus (%)	Soil organic matter content/ humus (class)	Estimation of horizon specific fine earth (Texture class value for AWC)	Soil organic matter content/ humus (correction value for AWC)	(Texture and SOM content correction) Factor a	(Fine earth content) Factor b	(Horizon depth) Factor c	Horizon wise ASWSC d= a x b x c	H Depth (No. 1) (cm)	H Depth (No. 2) (cm)	H Depth (No. 3) (cm)	H Depth (Mean) (cm)	Skeleton (volume %)	Fine earth (volume %)	Colour (Munsell)	Ratio of sand /clay /silt in fine earth	Soil texture class (German)	Soil texture class (FAO)	Soil organic matter content/ humus (short form)	Soil organic matter content/ humus (%)	Soil organic matter content/ humus (class)	Estimation of horizon specific fine earth (Texture class value for AWC)	Soil organic matter content/ humus (correction value for AWC)	(Texture and SOM content correction) Factor a	(Fine earth content) Factor b	(Horizon depth) Factor c	Horizon wise ASWSC d= a x b x c	H Depth (No. 1) (cm)	H Depth (No. 2) (cm)	H Depth (No. 3) (cm)	H Depth (Mean) (cm)	Skeleton (volume %)	Fine earth (volume %)	Colour (Munsell)	Ratio of sand /clay /silt in fine earth
1	1	1		12	11	7	10	70	30	10YR3/3	40:20:40	Ls2	Loam	h3	2-5	Moderate	21	3	24	0.3	1	7.2	34	33	37	34.6667	75	25	10YR5/8	40:35:25	Lts	Clay loam	h1	<1	Very weak	17	0	17	0.25	3.46667	14.7333
1	2	2		4	5	10	6.33333	25	75	10YR3/2	40:20:40	Ls2	Loam	h3	2-5	Moderate	21	3	24	0.75	0.633333	11.4	16	27	22	21.6667	75	25	10YR5/6	40:40:20	Lts	Clay loam	h1	<1	Very weak	17	0	17	0.25	2.16667	9.20833
1	3	3		10	14	4	9.33333	20	80	10YR3/2	50:5:45	Su4	Sandy loam	h3	2-5	Moderate	27	2	29	0.8	0.933333	21.6533	16	15	26	19	50	50	10YR4/4	50:30:20	Ls4	Sandy clay loam	h1	<1	Very weak	20	0	20	0.5	1.9	19
1	4	4		20	19	4	14.3333	30	70	10YR4/3	50:5:45	Su4	Sandy loam	h1	<1	Very weak	27	0	27	0.7	1.43333	27.09	28	30	37	31.6667	50	50	10YR5/6	50:30:20	Ls4	Sandy clay loam	h1	<1	Very weak	20	0	20	0.5	3.16667	31.6667
1	5	5		2	5	3	3.33333	2	98	10YR3/3	60:5:35	Su3	Sandy loam	h3	2-5	Moderate	25	3	28	0.98	0.333333	9.14667	4	6	4	4.66667	10	90	10YR4/1	60:10:30	Sl3	Sandy loam	h1	<1	Very weak	22	0	22	0.9	0.466667	9.24	27	35	32	31.3333	20	80	10YR5/8	50:20:30
1	6	6		4	8	3	5	1	99	10YR3/3	60:5:35	Su3	Sandy loam	h3	2-5	Moderate	25	3	28	0.99	0.5	13.86	14	6	7	9	4	96	10YR5/6	50:40:10	Ts3	Sandy clay	h1	<1	Very weak	16	0	16	0.96	0.9	13.824	20	26	29	25	20	80	10YR5/8	50:30:20
2	1	7		35	26	20	27	30	70	10YR2.5/1	60:30:10	Ts4	Sandy clay loam	h4	5-10	Strong	17	7	24	0.7	2.7	45.36	6	21	20	15.6667	75	25	10YR5/6	50:40:10	Ts3	Sandy clay	h1	<1	Very weak	16	0	16	0.25	1.56667	6.26667
2	2	8		2	3	8	4.33333	75	25	10YR2.5/1	60:30:10	Sl3	Sandy loam	h4	5-10	Strong	22	4	26	0.25	0.433333	2.81667	26	22	34	27.3333	70	30	10YR5/6	60:25:15	Ls4	Sandy clay loam	h1	<1	Very weak	20	0	20	0.3	2.73333	16.4
2	3	9		9	11	18	12.6667	5	95	10YR3/2	60:5:35	Su3	Sandy loam	h3	2-5	Moderate	25	3	28	0.95	1.26667	33.6933	38	36	23	32.3333	10	90	10YR5/6	70:10:20	Sl3	Sandy loam	h1	<1	Very weak	22	0	22	0.9	3.23333	64.02
2	4	10		10	11	12	11	45	55	10YR3/3	60:5:35	Su3	Sandy loam	h3	2-5	Moderate	25	3	28	0.55	1.1	16.94	20	16	19	18.3333	75	25	10YR4/4	70:10:20	Sl3	Sandy loam	h1	<1	Very weak	22	0	22	0.25	1.83333	10.0833
2	5	11		9	7	16	10.6667	5	95	10YR3/2	60:15:25	Sl4	Sandy loam	h3	2-5	Moderate	22	4	26	0.95	1.06667	26.3467	29	31	22	27.3333	65	35	10YR5/6	60:30:10	Ts4	Sandy clay loam	h1	<1	Very weak	17	0	17	0.35	2.73333	16.2633
2	6	12		10	2	7	6.33333	30	70	10YR3/3	70:5:25	Su3	Sandy loam	h3	2-5	Moderate	25	3	28	0.7	0.633333	12.4133	17	20	25	20.6667	30	70	10YR4/4	60:10:30	Sl3	Sandy loam	h1	<1	Very weak	22	0	22	0.7	2.06667	31.8267	22	30	24	25.3333	50	50	10YR5/6	60:20:20
3	1	13		10	9	8	9	20	80	10YR2.5/1	50:10:40	Slu	Loam	h4	5-10	Strong	23	4	27	0.8	0.9	19.44	66	70	70	68.6667	20	80	10YR5/6	60:20:20	Ls4	Sandy clay loam	h1	<1	Very weak	20	0	20	0.8	6.86667	109.867
3	2	14		6	6	4	5.33333	2	98	10YR2.5/1	50:15:35	Ls3	Loam	h4	5-10	Strong	21	5	26	0.98	0.533333	13.5893	45	48	48	47	5	95	10YR5/4	60:20:20	Ls4	Sandy clay loam	h1	<1	Very weak	20	0	20	0.95	4.7	89.3
3	3	15		5	4	6	5	10	90	10YR3/2	65:15:20	Sl4	Sandy loam	h3	2-5	Moderate	22	4	26	0.9	0.5	11.7	46	41	29	38.6667	15	85	10YR4/4	60:25:15	Ls4	Sandy clay loam	h1	<1	Very weak	20	0	20	0.85	3.86667	65.7333
3	4	16		7	8	8	7.66667	10	90	10YR3/3	50:5:45	Su4	Sandy loam	h3	2-5	Moderate	27	2	29	0.9	0.766667	20.01	40	42	44	42	55	45	10YR4/4	65:25:10	St3	Sandy clay loam	h1	<1	Very weak	18	0	18	0.45	4.2	34.02
3	5	17		5	5	7	5.66667	5	95	10YR3/3	65:5:30	Su3	Sandy loam	h3	2-5	Moderate	25	3	28	0.95	0.566667	15.0733	33	35	31	33	10	90	10YR4/4	65:15:20	Sl4	Sandy loam	h1	<1	Very weak	22	0	22	0.9	3.3	65.34
3	6	18		7	3	7	5.66667	10	90	10YR3/3	70:2:28	Su3	Sandy loam	h3	2-5	Moderate	25	3	28	0.9	0.566667	14.28	11	16	13	13.3333	35	65	10YR3/2	70:10:20	Sl3	Sandy loam	h3	2-5	Moderate	22	3	25	0.65	1.33333	21.6667	23	20	22	21.6667	50	50	10YR5/6	65:30:5
4	1	19		12	8	14	11.3333	30	70	10YR3/2	65:10:25	Sl3	Sandy loam	h3	2-5	Moderate	22	3	25	0.7	1.13333	19.8333	55	64	60	59.6667	30	70	10YR4/4	60:25:15	Ls4	Sandy clay loam	h1	<1	Very weak	20	0	20	0.7	5.96667	83.5333
4	2	20		8	7	9	8	5	95	10YR3/3	65:10:25	Sl3	Sandy loam	h3	2-5	Moderate	22	3	25	0.95	0.8	19	64	47	43	51.3333	5	95	10YR5/6	50:20:30	Ls3	Loam	h1	<1	Very weak	21	0	21	0.95	5.13333	102.41
4	3	21		18	19	15	17.3333	25	75	10YR4/3	50:20:30	Ls3	Loam	h1	<1	Very weak	21	0	21	0.75	1.73333	27.3																			0
4	4	22		19	10	11	13.3333	5	95	10YR3/2	65:15:20	Sl4	Sandy loam	h3	2-5	Moderate	22	4	26	0.95	1.33333	32.9333	57	53	54	54.6667	5	95	10YR5/6	65:20:15	Ls4	Sandy clay loam	h1	<1	Very weak	20	0	20	0.95	5.46667	103.867
4	5	23		8	9	6	7.66667	1	99	10YR3/2	70:2:28	Su3	Sandy loam	h3	2-5	Moderate	25	3	28	0.99	0.766667	21.252	12	7	6	8.33333	30	70	10YR5/6	65:10:25	Sl3	Sandy loam	h1	<1	Very weak	22	0	22	0.7	0.833333	12.8333	36	41	34	37	20	80	10YR5/8	65:20:15
4	6	24		6	4	5	5	1	99	10YR3/1	70:5:25	Su3	Sandy loam	h3	2-5	Moderate	25	3	28	0.99	0.5	13.86	22	21	15	19.3333	15	85	10YR5/4	45:20:35	Ls2	Loam	h1	<1	Very weak	21	0	21	0.85	1.93333	34.51
[truncated: 18 more columns]
